# Supplementary material
Source: PubMed Central journal article supplement (PMC1500841)
Supplement: 7601165s1.pdf [file 7601165s1.pdf]

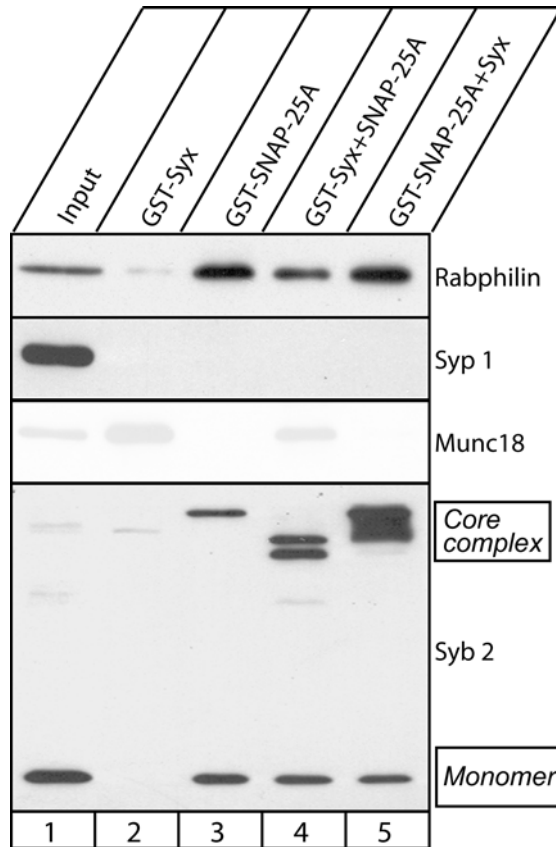

Supplementary Figure 1

**Binding of rabphilin to SNAP-25.** Binding of rabphilin to SNAP-25. GST-pulldowns of rat brain proteins with recombinant SNARE proteins performed in 50 mM HEPES pH 7.2, 100 mM NaCl, 4 mM EGTA, 2 mM MgCl<sub>2</sub>, 1 mM DTT, protease inhibitor cocktail (Roche), and 0.5% Triton X-100. After 30 min incubation at 4 °C, rat brain proteins bound to immobilized GST, GST-syntaxin, GST-SNAP-25, and GST-synaptobrevin were analysed by immunoblotting for rabphilin, synaptophysin 1 (Syp 1), and Munc18-1. The bottom panel shows a Coomassie-blue stained gel of the GST-proteins used to illustrate that similar amounts of protein were employed.
