# Supplementary material
Source: PubMed Central journal article supplement (PMC1500841)
Supplement: 7601165s2.pdf [file 7601165s2.pdf]

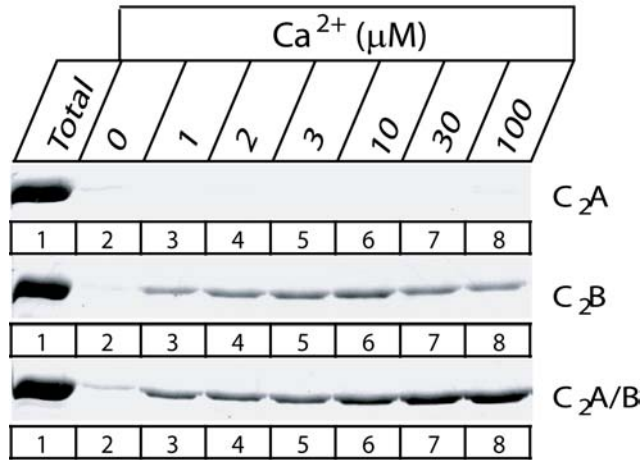

Supplementary Figure 2

**Phospholipid binding by rabphilin C2-domains.** Phospholipid binding of rabphilin C<sub>2</sub>-domains. Images depict Coomassie stained gels of proteins bound to liposomes at the indicated concentrations of free Ca<sup>2+</sup>. These assays were performed in a HEPES buffer (50 mM HEPES pH 6.8, 100 mM NaCl, and 4 mM EGTA) by measuring the coprecipitation of recombinant proteins with 25% PS/75% PC heavy liposome containing 0.5 M sucrose by using centrifugation assay in the presence of increasing concentrations of free Ca<sup>2+</sup> as previously described (Fernandez et al, 2001 Neuron 32:1057-69; Sugita et al, 2002 EMBO J, 21:270-280).
