# Supplementary material
Source: PubMed Central journal article supplement (PMC1500841)
Supplement: 7601165s3.pdf [file 7601165s3.pdf]

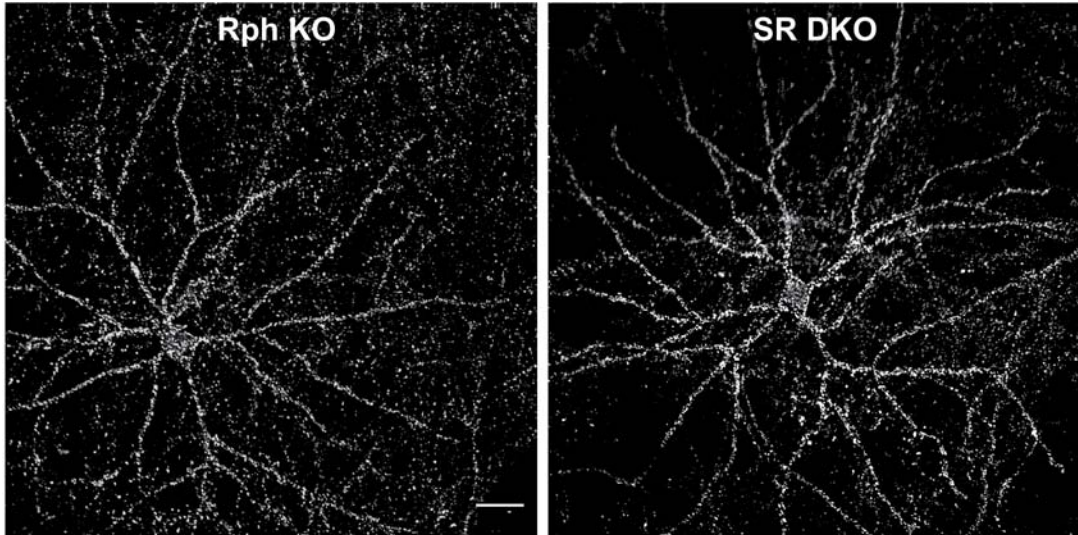

Supplementary Figure 3

**Immunofluorescence staining of cultured hippocampal neurons from KO mice lacking either only rabphilin (Rph KO) or both rabphilin and synaptobrevin 2 (SR DKO). Neurons were labeled with antibodies to synaptotagmin 1 and viewed in a confocal microscope (scale bar: 10  $\mu$ m).**
