# Supplementary material
Source: PubMed Central journal article supplement (PMC1500841)
Supplement: 7601165s4.pdf [file 7601165s4.pdf]

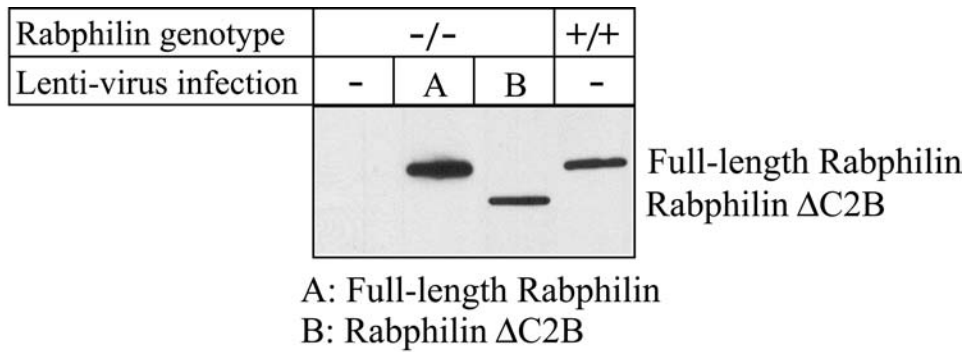

#### Supplementary Figure 4

**Expression of full-length or C-terminally truncated rabphilin in cultured neurons.** Proteins from uninfected wildtype and rabphilin KO cultured neurons or from rabphilin KO neurons infected with lentivirus expressing full-length or C-terminally truncated rabphilin were examined by immunoblotting with rabphilin antibodies. Neuronal cultures were infected four days after plating with lentivirus containing full length rabphilin and rabphilin without C<sub>2</sub>B domain. After two weeks for expression we rinsed neuronal cultures with PBS once and added 50  $\mu$ l of 1X SDS buffer to each well on the 24 well plate to dissolve cells. Cell lysate was collected and boiled for 5 minutes. Samples of 15  $\mu$ l were loaded onto SDS-PAGE gel to separate proteins and rabphilin (A, full length and B, C<sub>2</sub>B deletion) was detected by western blot using a monoclonal antibody.
